# Supplementary material
Source: Research Square preprint supplement (doi:10.21203/rs.3.rs-10103914/v1)
Supplement: Supplementary file 1 [file bcf1b02dcf8ec3acaa6598bd.docx]

**Supplementary Note 1: Additional Experimental details and Methods**

**Figure S1 Phylogenetic Tree**

**Figure S2 Molecular Docking Analysis of *Asp*RedAm and Ancestral Sequences**

**Figure S3 Free Energy Landscape (FEL) of Mutants at 303 K**

**Figure S4 SDS-PAGE of mutants. (M:Marker 1:Anc74_7; 2Anc75_8; 3: Anc75_20)**

**Figure S5 Optimal Temperature and pH of *Asp*RedAm and variants**

**Figure S6 Organic Solvent Stability**

**Figure S7 Free energy landscape analysis of *Asp*RedAm and variants**

**Figure S8 Surface electrostatic potential analysis of *Asp*RedAm and variants**

**Supplementary Note 1: Additional Experimental details and Methods**

The enzyme sequences used in this study are as follows:

The amino acid sequence of *Asp*RedAm is as follows:

MSKHIGIFGLGAMGTALAAKYLEHGYKTSVWNRTTAKAIPLVEQGAKLASTISEGVNANDLIIICLLNNQVVEDALRDALQTLPSKTIVNLTNGTPNQARKLADFVTSHGARYIHGGIMAVPTMIGSPHAVLLYSGESLELFQSIESHLSLLGMSKYLGTDAGSASLHDLALLSGMYGLFSGFLHAVALIKSGQDTSTTATGLLPLLTPWLSAMTGYLSSIAKQIDDGDYATQGSNLGMQLAGVENIIRAGEEQRVSSQMILPIKALIEQAVGEGHGGEDLSALIEYFKVGKNVD

The amino acid sequence of Anc74_7 is as follows:

MMSSVSIFGLGAMGTALASRFLEEKYKVAVWNRSPDK*Asp*LLDKGANLAHTVVDGIKASDLIIIVLLDNAAVEATLAGALDHLHGKTIVNLTKGTPDQARKLSDLVVSHGARYVHGGIMMTPSMIGSPYALILYSGSSQEAFKAAESDLSVLAKCVFLGEDAGTASLHDLALLSGMYGLFSGFLHATALVRSEKSSAVKFMDLLVPWLGAMTEYTKAMAKQIDEGKYTSEGSNLAMQLVAIQNIIDASEAQQVSAEFIRPMKELMEKAVAAGHGGDDISSLIDFVKLG

The amino acid sequence of Anc75_8 is as follows:

MSSSVSIFGLGDMGTALASKFLEKGYKTTVWNRTPAKAKPLVEKGAHLASTVAEGIEASDLIIICFLDNKAVNETLSKALSSLSGRTIVNLTTGTPDQARKTSELVTAHGARYIHGGIMAVPDMIGSPAAVLLYSGSSQEAFQSVEKDLSVLGTSKFLGTDPGSAALHDLALLSGMYGLFSGFLHAVALVRSEKGSATEFLPLLVPWLSAMTGYLGVLAKQIDEGDYASQGSNLAMQLVAIENIVKASEEQGVSSEMIRPIKALMERAVAAGRGGDDISSLIELVTLR

The amino acid sequence of Anc75_20 is as follows:

MSSSVSIFGLGEMGTALASKFLEKGYKTTVWNRTPAKAKPLVEKGAHLASTVAEGIEASDLIIICFLDNKAVNETLSKALSSLSGRTIVNFTNGTPDQARKTSELVTAHGARYIHGGIMAVPDMIGSPAAVLLYSGSSQEAFQSVEKDLSVLGTSKFLGTDPGSAALHDLALLSGMYGLFSGFLHAVALVRSEKGSATEFLPLLVPWLSAMTGYLGVLAKQIDEGDYASQGSNLAMQLVAIENIVKASEEQGVSSEMIRPIKALMERAVAAGRGGDDISSLIELVTLR

Figure S1


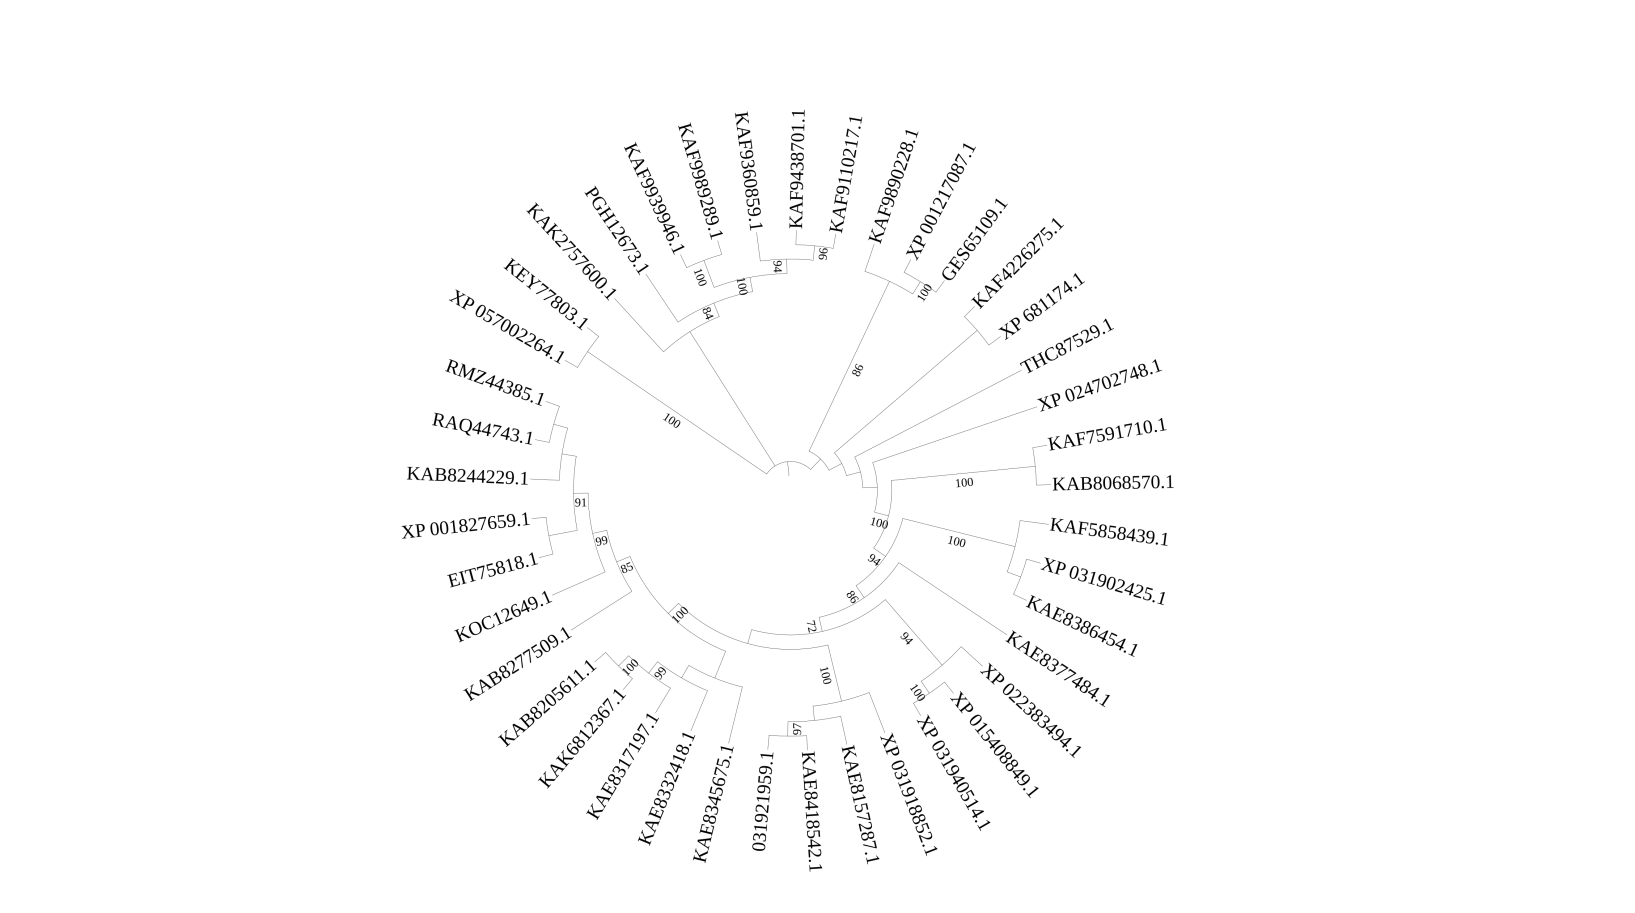


**Figure S1 Phylogenetic Tree**

Figure S2


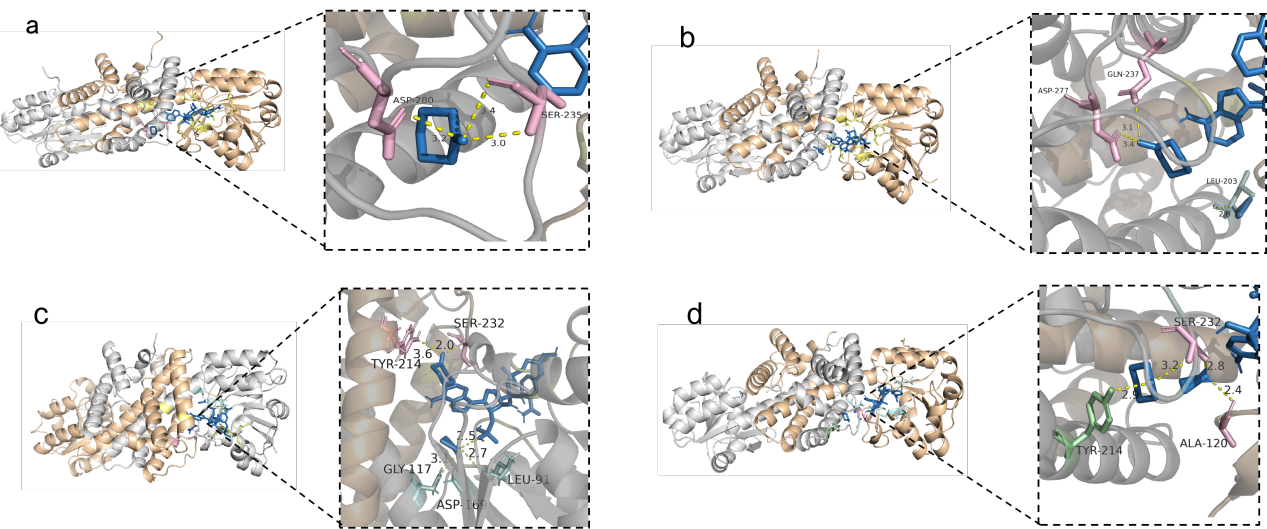


**Figure S2 Molecular Docking Analysis of *Asp*RedAm and Ancestral Sequences**

Note: (a) Molecular docking analysis of *Asp*RedAm; (b) Molecular docking analysis of Anc43; (c) Molecular docking analysis of Anc74; (d) Molecular docking analysis of Anc75)

Figure S3


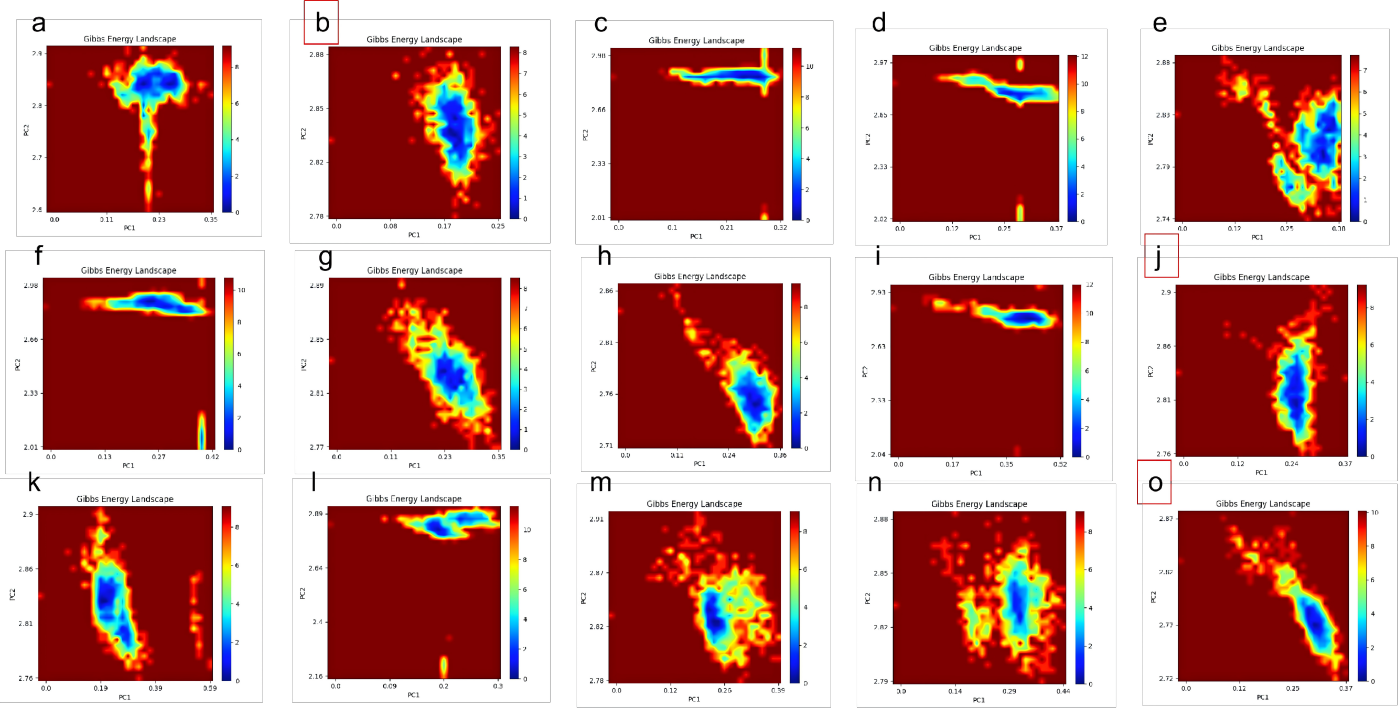


**Figure S3 Free Energy Landscape (FEL) of Mutants at 303 K**

Figure S4


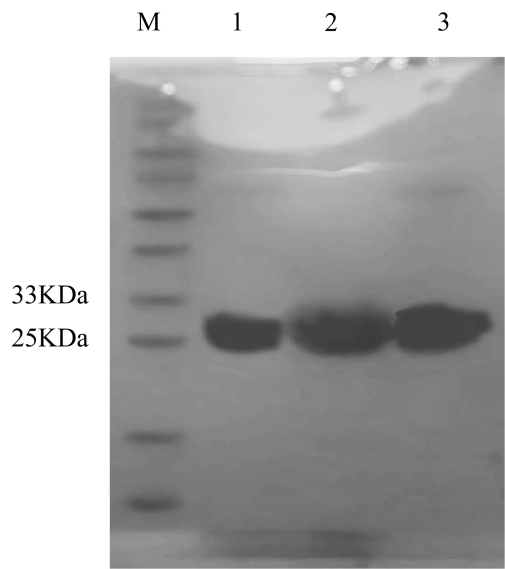


**Figure S4 SDS-PAGE of mutants. (M:Marker; 1:Anc74_7; 2Anc75_8; 3: Anc75_20)**

Figure S5


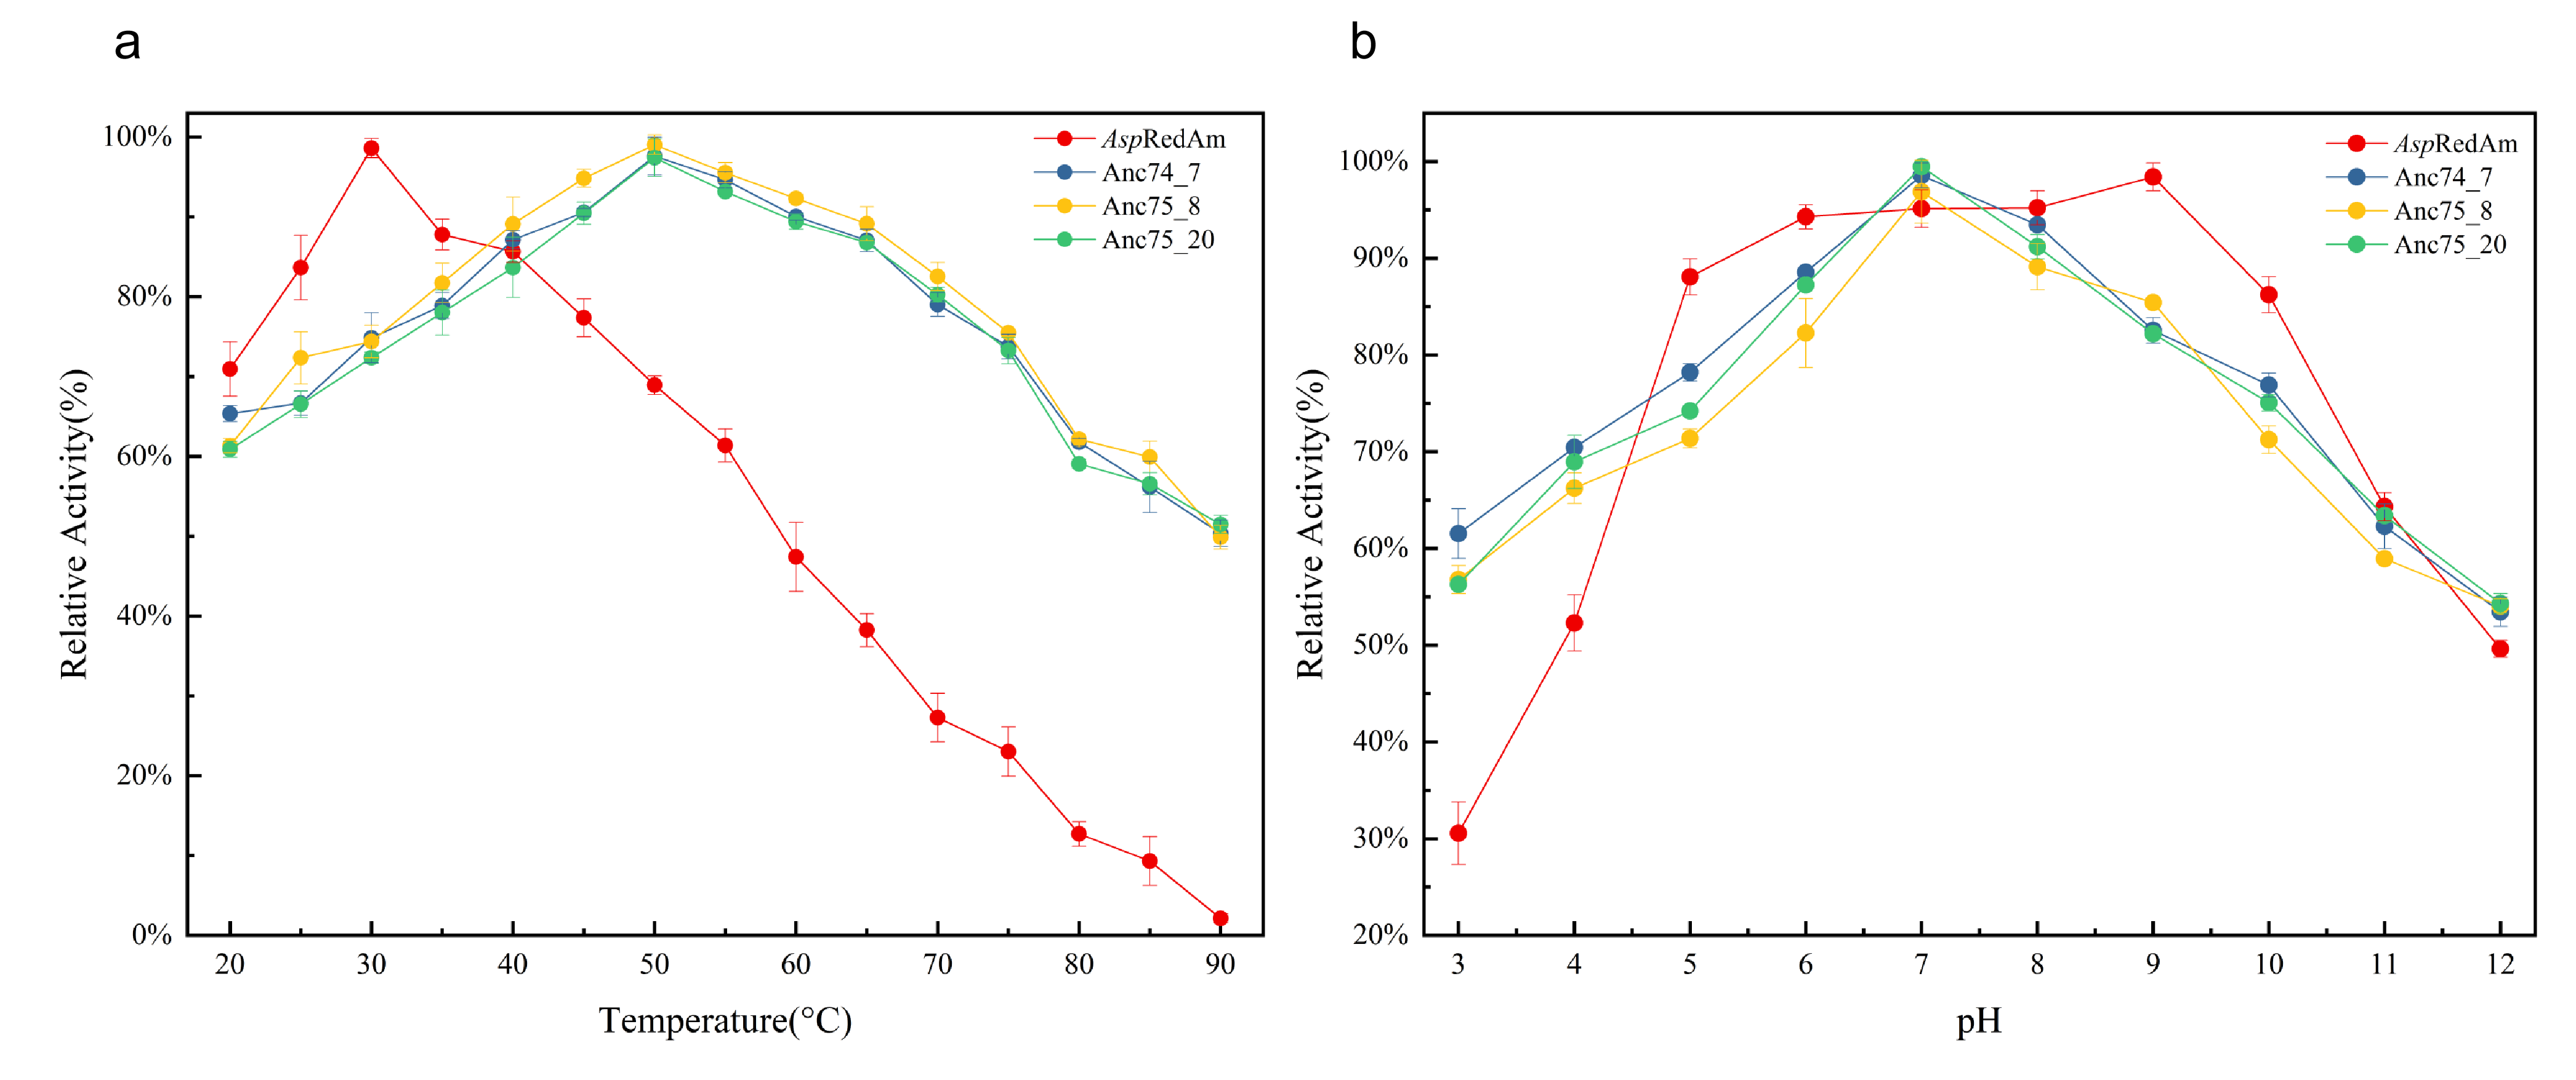


**Figure S5 Optimal Temperature and pH of *Asp*RedAm and variants**

Note: (a) Optimal temperature of *Asp*RedAm and variants; Figure (b) Optimal pH of *Asp*RedAm and variants

Figure S6


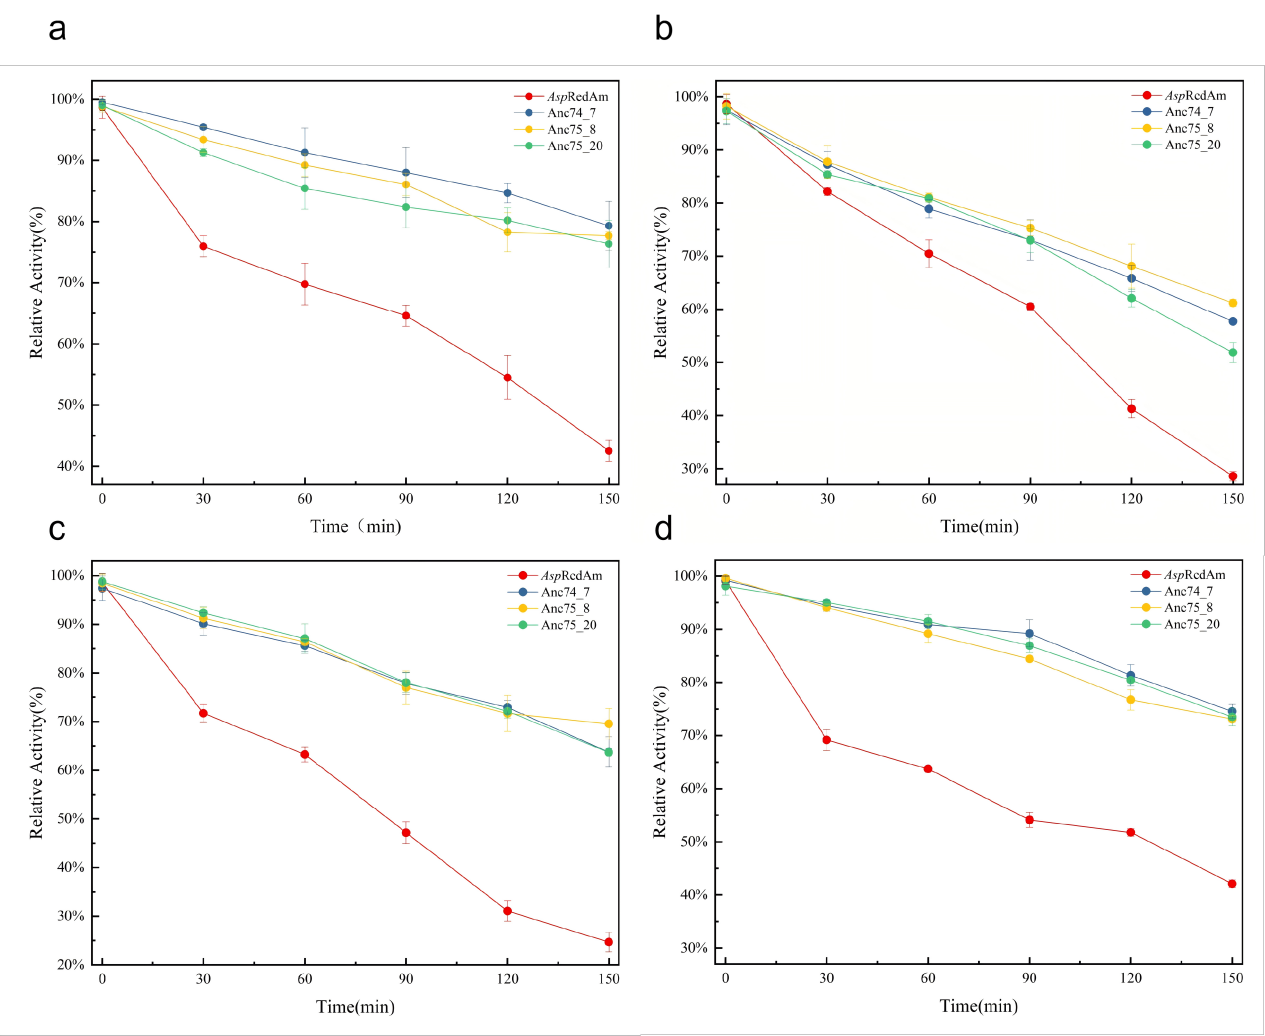


**Figure S6 Organic Solvent Stability**

Note: (a) Stability of *Asp*RedAm and variants in methanol; (b) Stability of *Asp*RedAm andvariants in isopropanol; (c) Stability of *Asp*RedAm and variants in ethyl acetate; (d) Stability of *Asp*RedAm and variants in DMSO)

Figure S7


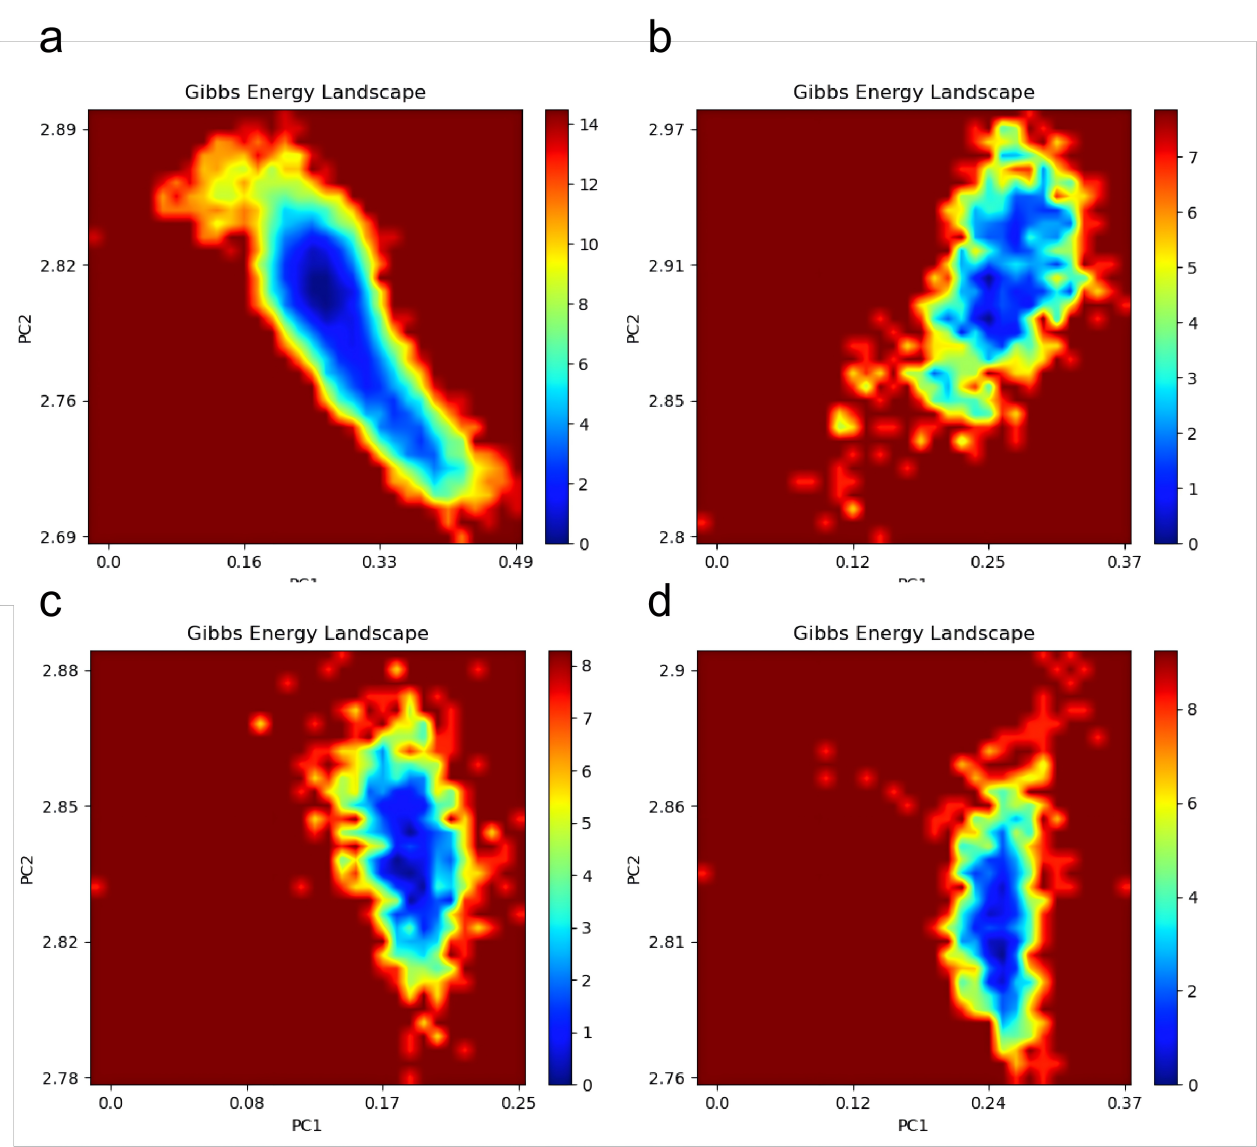


**Figure S7 Free energy landscape analysis of *Asp*RedAm and variants**

Note: (a) Free energy landscape analysis of *Asp*RedAm; (b) Free energy landscape analysis of Anc74_7; (c) Free energy landscape analysis of Anc75_8; (d) Free energy landscape analysis of Anc75_20

Figure S8


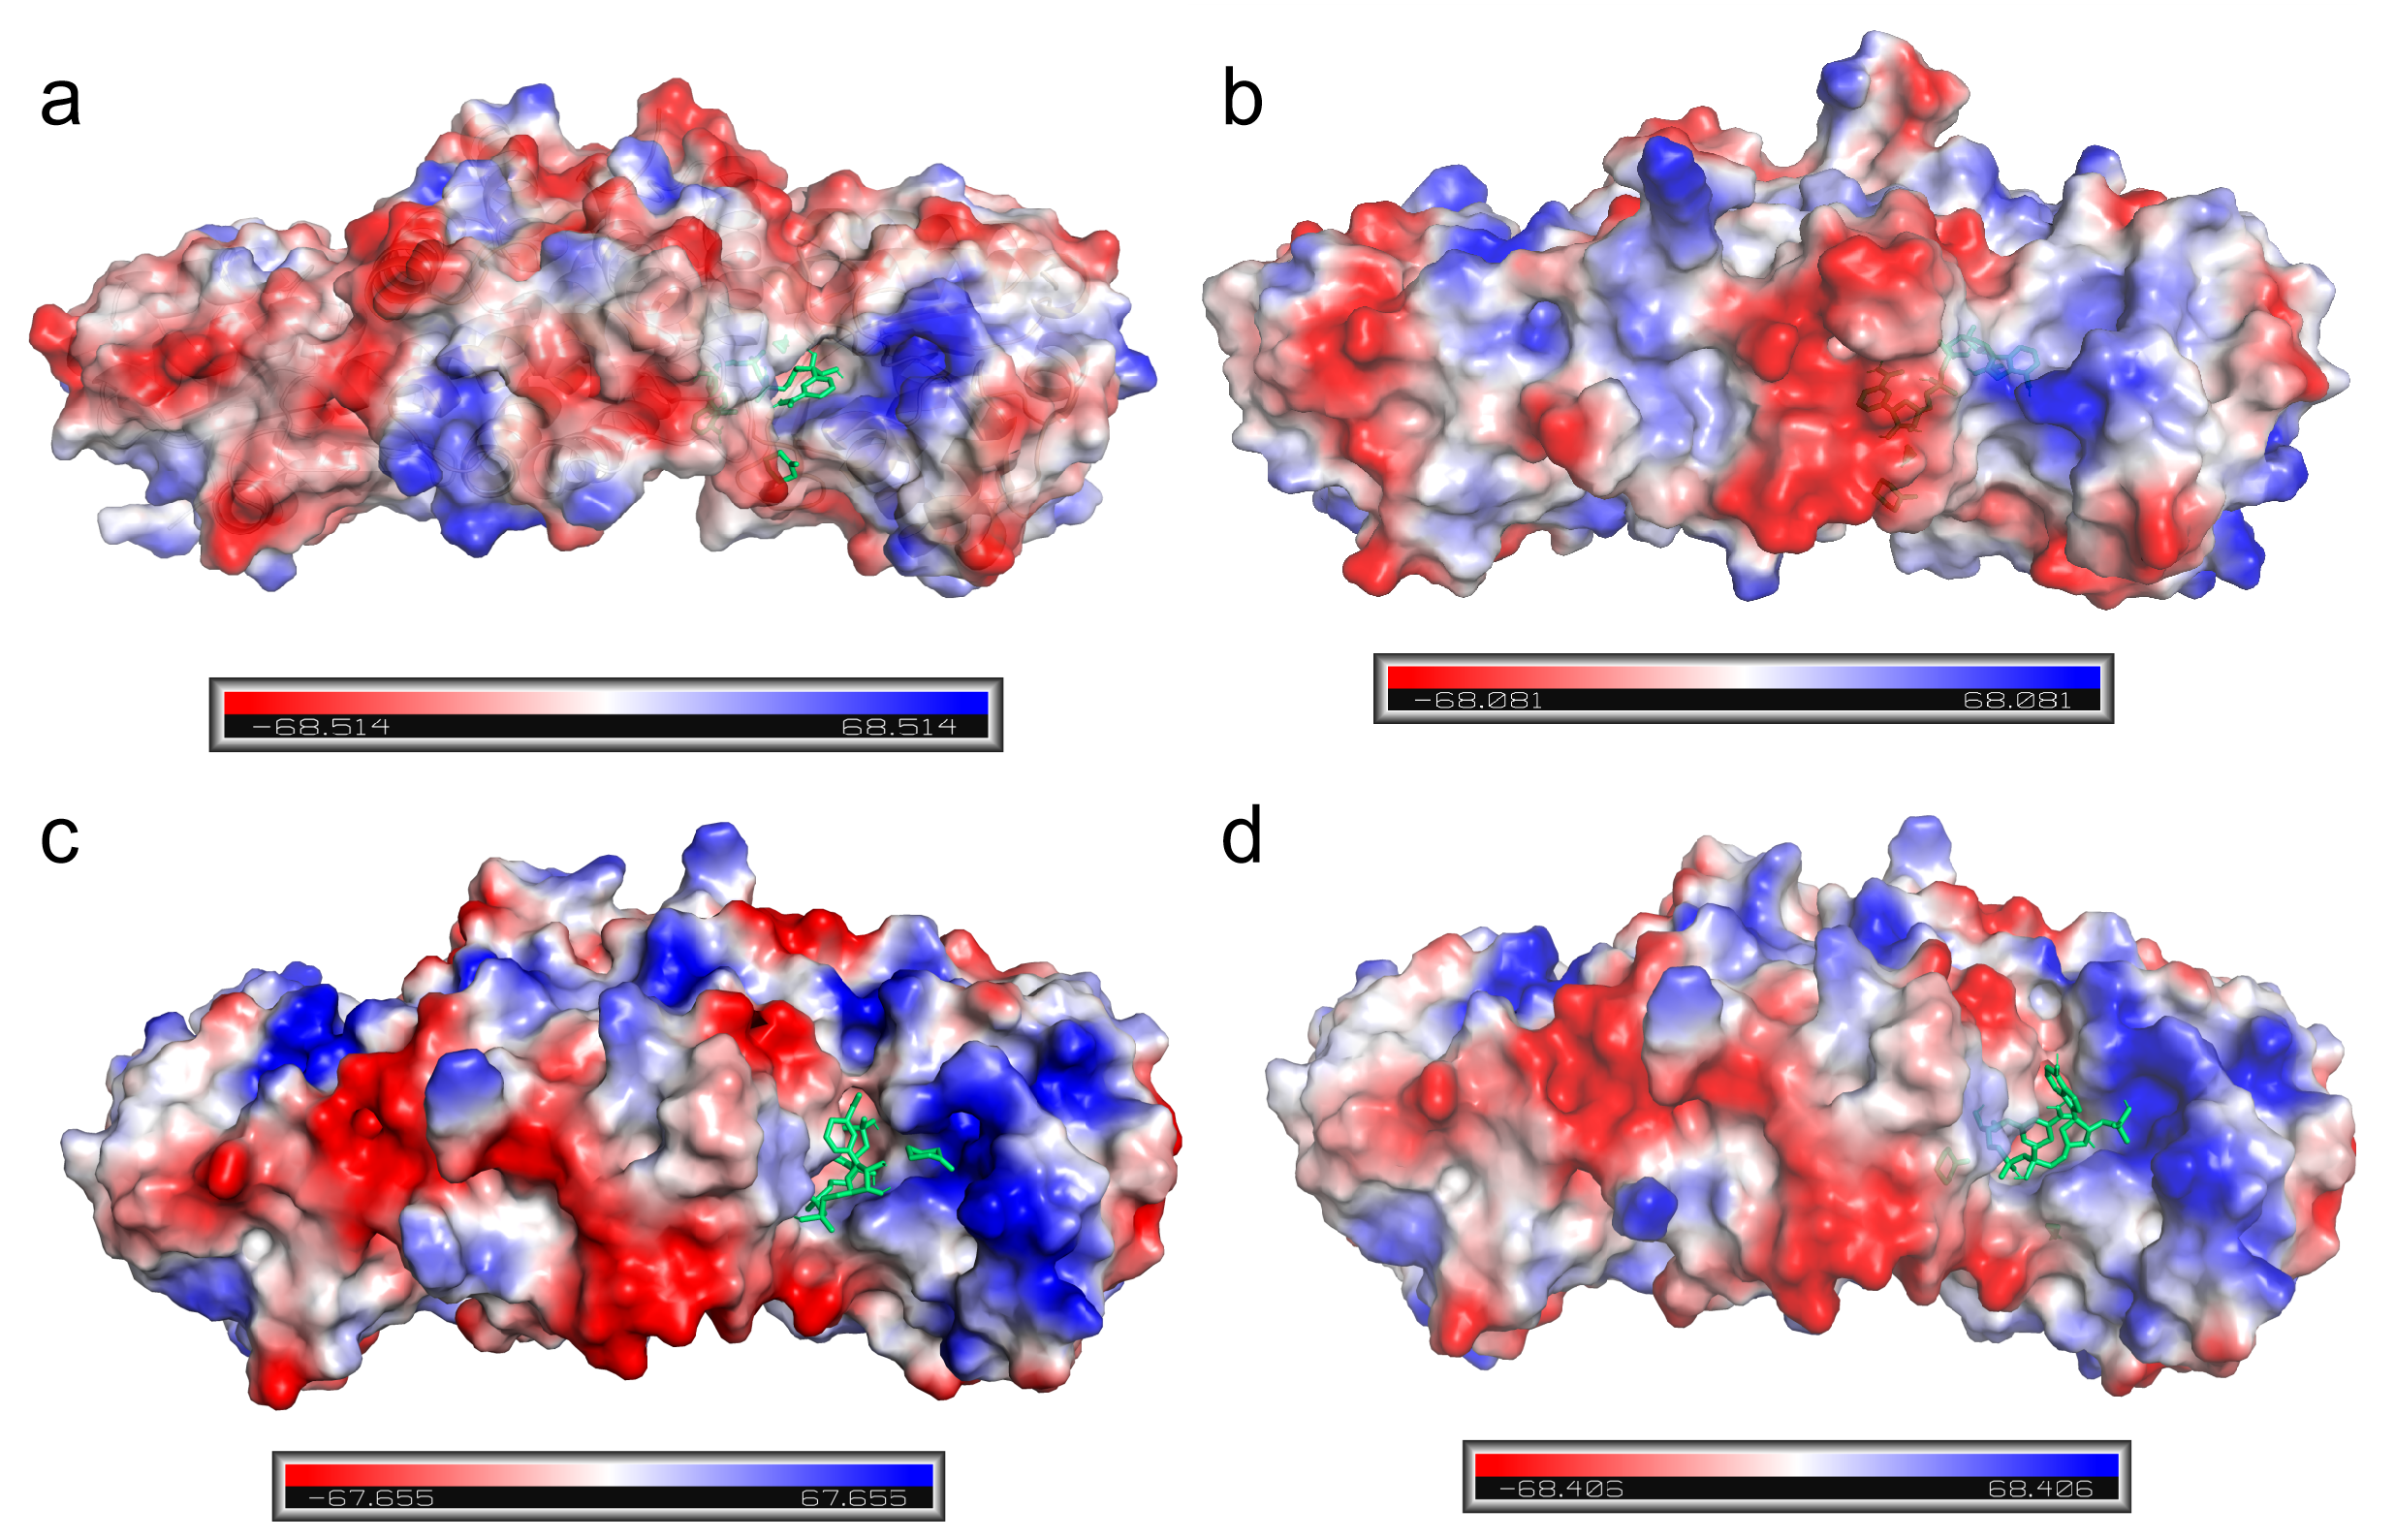


**Figure S8 Surface electrostatic potential analysis of *Asp*RedAm and ancestral sequence variants**

Note: (a) Surface electrostatic potential analysis of *Asp*RedAm; (b) Surface electrostatic potential analysis of Anc74_7; (c) Surface electrostatic potential analysis of Anc75_8; (d) Surface electrostatic potential analysis of Anc75_20)
